# Supplementary material for: Generation of foxn1/Casper Mutant Zebrafish for Allograft and Xenograft of Normal and Malignant Cells
Source: PubMed Central journal article supplement — Stem Cell Reports. 2020 Aug 20;15(3):749–60. doi: 10.1016/j.stemcr.2020.07.020 (PMC7486299; doi:10.1016/j.stemcr.2020.07.020), 2020-08-20
Supplement: mmc2.pdf [file mmc2.pdf]

# Generation of *foxn1/Casper* Mutant Zebrafish for Allograft and Xenograft of Normal and Malignant Cells

Peng Lv,<sup>1,2,6,7</sup> Dongyuan Ma,<sup>1,2,6,7</sup> Shuai Gao,<sup>1,2,6,7</sup> Yifan Zhang,<sup>1,2,6,7</sup> Young-Ki Bae,<sup>4,7</sup> Guixian Liang,<sup>1,2,6</sup> Suwei Gao,<sup>1,2,6</sup> Jung-Hwa Choi,<sup>5</sup> Cheol-Hee Kim,<sup>5</sup> Lu Wang,<sup>3,\*</sup> and Feng Liu<sup>1,2,6,\*</sup>

<sup>1</sup>State Key Laboratory of Membrane Biology, Institute of Zoology, Chinese Academy of Sciences, Beijing 100101, China

<sup>2</sup>Institute for Stem Cell and Regeneration, Chinese Academy of Sciences, Beijing 100101, China

<sup>3</sup>State Key Laboratory of Experimental Hematology, Institute of Hematology and Blood Diseases Hospital, Chinese Academy of Medical Sciences & Peking Union Medical College, Tianjin 300020, China

<sup>4</sup>Comparative Biomedical Research Branch, Research Institute, National Cancer Center, Goyang 10408, Republic of Korea

<sup>5</sup>Department of Biology, Chungnam National University, Daejeon 34134, Republic of Korea

<sup>6</sup>University of Chinese Academy of Science, Beijing 100049, China

<sup>7</sup>Co-first author

\*Correspondence: wanglu1@ihcams.ac.cn (L.W.), liuf@ioz.ac.cn or <http://english.biomembrane.ioz.cas.cn/research/groups/liufeng> (F.L.)  
<https://doi.org/10.1016/j.stemcr.2020.07.020>

## SUMMARY

Cell transplantation into immunodeficient recipients is a widely used approach to study stem cell and cancer biology; however, studying cell states post transplantation *in vivo* is inconvenient in mammals. Here, we generated a *foxn1/Casper* mutant zebrafish that is transparent and exhibits T cell deficiency. By employing the line for hematopoietic stem cell (HSC) transplantation (HSCT), we could achieve nonconditioned transplantation. Meanwhile, we found that fetal HSCs from 3 days post fertilization zebrafish embryos produce a better transplant outcome in *foxn1/Casper* mutants, compared with adult HSCs. In addition to HSCT, the *foxn1/Casper* mutant is feasible for allografts of myelodysplastic syndrome-like and muscle cells, as well as xenografts of medaka muscle cells. In summary, *foxn1/Casper* mutants permit the nonconditioned engraftment of multiple cell types and visualized characterization of transplanted cells *in vivo*.

## INTRODUCTION

Cell transplantation is a well-established method to study various biological events in development, immunology, cancer biology, and regenerative medicine (Li et al., 2011; Moore and Langenau, 2016; Trounson and McDonald, 2015). Hematopoietic stem cell (HSC) transplantation (HSCT) is a widely used paradigm of cell transplantation to study HSC properties and treat patients with hematological malignancies in current clinical therapy settings (Barriga et al., 2012; Jill et al., 2011; Mantel et al., 2015). Given that the unmatched polymorphic major histocompatibility between donors and recipients can result in noneffective HSCT (Tay et al., 1995; Thomas et al., 1971), studying the relationship between donors and recipients has long been regarded as a central issue in this field (Becker et al., 1963; Wu et al., 1967). Initially, irradiated mice and zebrafish were used to receive engrafted HSCs, because irradiation was able to suppress immune rejection and cleared the endogenous HSC compartment for the engraftment of donor HSCs in recipients (Traver et al., 2004). However, irradiation not only eliminates the immune cells, but also damages the HSC niche (Kapp et al., 2018; Zhou et al., 2017), which is required for successful reconstitution of the hematopoietic system. Therefore, immunodeficient recipients, such as *forkhead box N1* (*Foxn1*)-null mice (nude mice) (Fogh et al., 1977) and nonobese diabetic, *DNA-activated catalytic peptide-null*, *interleukin receptor 2 gamma*

*chain-null* mice (NSG mice) (Shultz et al., 2007), were generated for allograft and xenograft of HSCs and solid tumor cells. Although the immunodeficient mouse models have been extensively utilized for cell transplantation, it is still not convenient to directly observe the transplanted cells in real time *in vivo*.

The zebrafish has been an excellent vertebrate model for cell transplantation, owing to the generation of a transparent adult zebrafish, *Casper*, which allows for direct observation of fluorescence-labeled cells post transplantation (White et al., 2008). Through outcrossing of *Casper* with immunodeficient lines, several transplantation platforms in zebrafish have been established and applied to allograft or xenograft of normal and malignant cancer cells (Moore et al., 2016; Yan et al., 2019). However, these studies were limited in what they revealed of the stage-dependent characteristics of developmental cells. Our previous study demonstrated that zebrafish embryos with the *foxn1* mutation displayed deficient T cell development, largely due to deficient thymic epithelial cell development (Ma et al., 2012). Therefore, we asked whether *foxn1/Casper* mutant zebrafish could be used as recipients for studying stage-specific characteristics of developmental cells and identifying optimized transplantation strategies.

In this study, we describe a *foxn1/Casper* mutant zebrafish, a new type of transparent and immunodeficient line, which can be used as recipients for HSCT without irradiation. In addition, our newly generated homozygous

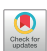

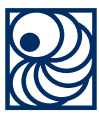

*foxn1/Casper* mutants exhibited a higher survival rate, and the female homozygous *foxn1/Casper* mutants are fertile compared with previously reported immunodeficient lines, such as *rag2*<sup>-/-</sup> (Tang et al., 2014) and *prkdc*<sup>-/-</sup> (Moore et al., 2016). Because of these complementary advantages of *foxn1/Casper* models, we can perform large-scale transplantation experiments. More importantly, the *foxn1/Casper* mutant line permits real-time visualization of transplanted cells *in vivo*. With the help of this mutant line, we uncovered the important characteristics of HSCs post transplantation and provided a new tool for studying the function of HSCs.

## RESULTS

### Generation and Characterization of *foxn1* Mutant Zebrafish

Previously, nude mice with the *Foxn1* mutation have been shown to be a convenient tool for HSCT and solid tumor cell transplantation (Fogh et al., 1977; Szadvari et al., 2016). To address whether zebrafish with the *foxn1* mutation could be used as recipients for transplantation, we generated a *foxn1* mutant zebrafish with the zinc finger nuclease technique (Kim et al., 2010). The 7 > 6 bp transition in the third exon of the *foxn1* gene induced a frame-shift mutation, which leads to a premature stop codon (Figures 1A, S1A, and S1B). To determine whether the mutation is missense in the mutant line, the Foxn1 protein in maternal-zygotic (MZ) mutants was detected, and the protein level was markedly decreased in the MZ mutants (Figures 1B and 1C). Consistently, quantitative real-time PCR (qRT-PCR) results also showed that the mRNA level of *foxn1* was significantly decreased in the MZ mutants (Figure 1D). Compared with the wild-type (WT) or heterozygous siblings, the adult *foxn1/Casper* mutants are easily distinguished by their smaller body size, especially for the males (Figures S1C and S1D). Importantly, the survival rate of *foxn1/Casper* mutants can reach approximately 60% under nonantibiotic conditions and even 86% under antibiotic-supplemented conditions (Figure S1E).

Previous studies revealed T cell defects in mice and humans with the *Foxn1* mutation (Romano et al., 2012). Moreover, our previous study also reported that defects in T cell development are readily observed in *foxn1* knock-down zebrafish embryos (Ma et al., 2012). Thus, we first wondered whether T cell development was indeed affected in *foxn1* mutant embryos. The expression of T cell related genes recombination activating 1 (*rag1*), chemokine (C-C motif) receptor 9a (*ccr9a*), and lymphocyte-specific protein-tyrosine kinase (*lck*) was decreased in the thymus of *foxn1* mutant embryos (Figure 1E). Consistently, the number of *rag2*-dsRed<sup>+</sup> cells was decreased in the thymus of

*foxn1* MZ mutant embryos at 5 days post fertilization (dpf) (Figure S1F). Histological analysis of 3-month-old adult zebrafish showed that the thymus was atrophic in *foxn1* mutants compared with WT (Figure 1F). These results showed that T cell development and thymic structure were impaired after *foxn1* deletion.

Next, we detected the expression level of differentiated hematopoietic cell markers in the kidney marrow (KM) of adult fish by qRT-PCR. Although the expression of the T and B cell receptor rearrangement genes *rag1* and *rag2* was not changed, the expression of mature T cell markers such as *lck*, T cell receptor  $\alpha$  (*tcra*), and T cell receptor  $\beta$  (*trcb*) was reduced significantly, whereas the expression of the mature B cell markers immunoglobulin heavy constant  $\mu$  (*igm*), immunoglobulin heavy constant  $\zeta$  (*igz*), paired box 5 (*pax5*), and CD37 molecule (*cd37*) was increased significantly (Figure 1G). Moreover, the natural killer (NK) cell marker interleukin-2 receptor  $\beta$  (*il2rb*) and the myelocyte markers lysozyme C (*lyz*) and myeloid-specific peroxidase (*mpo*) showed normal expression in *foxn1* mutants, indicating that the NK cell and myelocyte differentiation was not altered upon loss of *foxn1* (Figure 1G). Furthermore, we performed flow-cytometric analysis of KM, and the four major blood lineages (I, erythrocyte; II, myelocyte; III, lymphocyte; and IV, precursor) were distinguished by light scatter characteristics and morphology (Figures 1H and S1G) (Traver et al., 2003). The results revealed a marked reduction of lymphocyte number in *foxn1* mutants compared with that in WT or heterozygous siblings (Figure 1I and Table S1). We further assessed the *trcb* and *igm* rearrangements (Tang et al., 2014) and found that T cells in *foxn1* mutants displayed incomplete *trcb* rearrangements, while the *igm* rearrangements of B cells were not affected, indicating that the T cell receptor repertoire in *foxn1* mutants is different from that of WT (Figure 1J). Taken together, similar to the impaired T cell development in nude mice, *foxn1* mutant zebrafish also present T cell defects and thus might be suitable for cell transplantation.

### Direct Imaging of Transplanted HSCs *In Vivo* Using *foxn1/Casper* Mutants

To assess whether the *foxn1/Casper* mutants serve as cell transplantation recipients properly, HSCT (Pugach et al., 2009) was performed in *Casper*, 25-Gy-irradiated *Casper*, nonirradiated *foxn1/Casper*, and 15-Gy-irradiated *foxn1/Casper* recipients (Figure 2A). In brief, KM was isolated from 3-month-old Tg (CD41:GFP) zebrafish (Figure S2A) and dispersed in single-cell suspensions for cell sorting. Then, CD41-GFP<sup>lo</sup> HSCs (Ma et al., 2011) were confirmed under fluorescence microscopy (Figures S2B and S2C) and transplanted into recipients irradiated 2 days before. The effects of irradiation on survival rate were monitored dynamically under HSCT and non-HSCT conditions

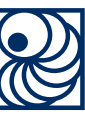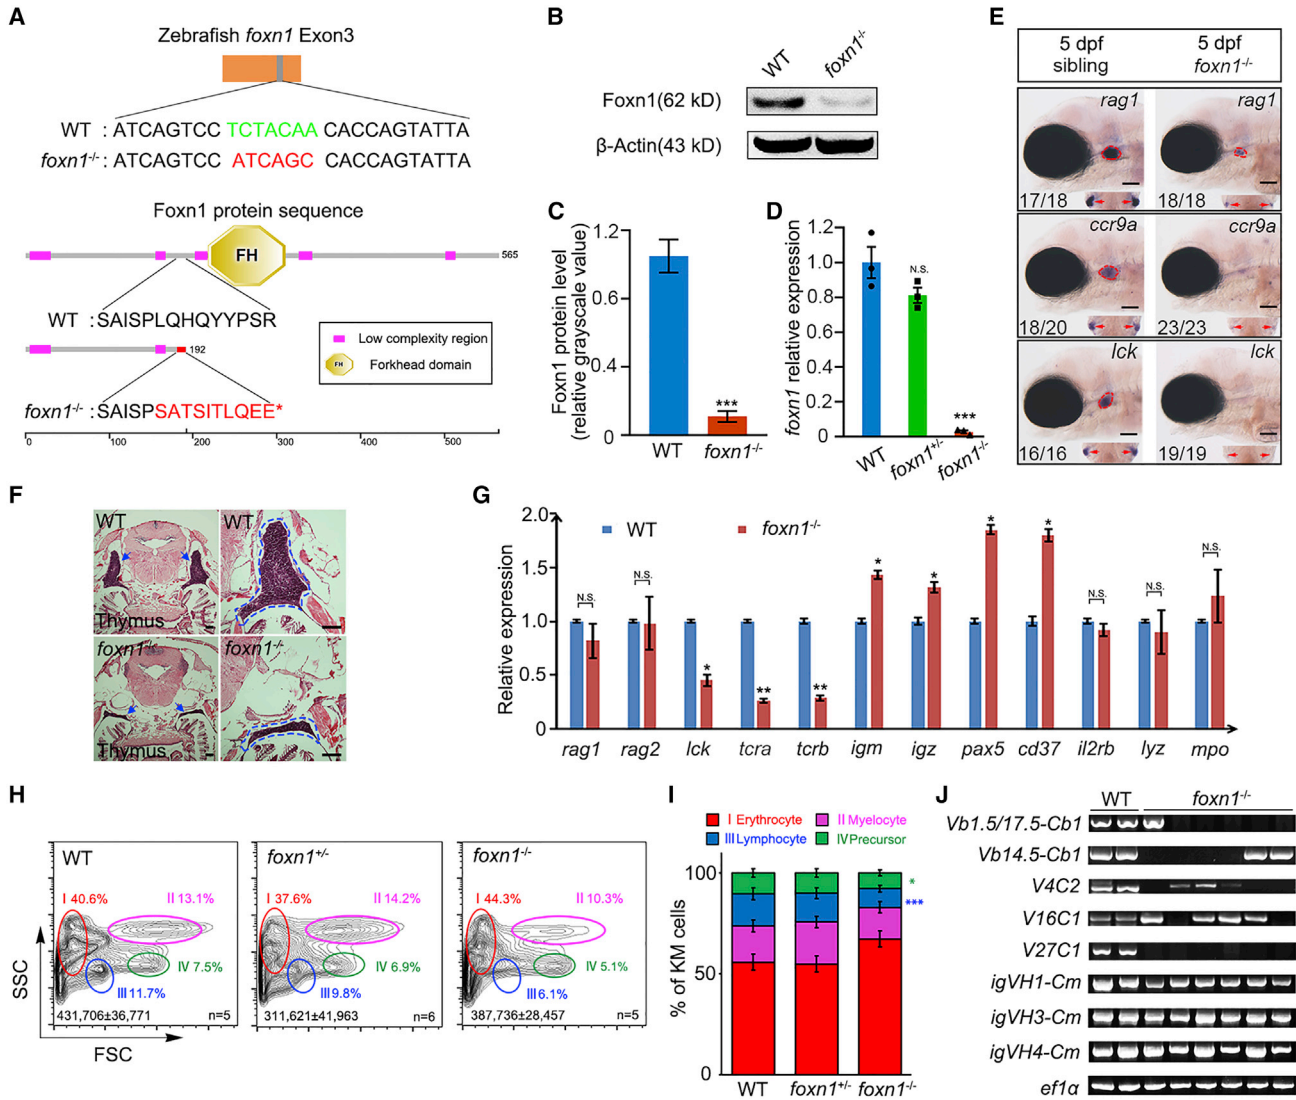

**Figure 1. Generation and Characterization of *foxn1* Mutant Zebrafish**

(A) Schematics of *foxn1* mutant DNA and protein sequences. The nucleotide sequence (top) shows that the wild-type (WT) sequence -TCTACAA- was mutated to -ATCAGC-, followed by the early termination of translation (bottom). The red letters denote the mutated protein sequence and red asterisk indicates the stop coding.

(B) The protein level of Foxn1 in 5 dpf WT and *foxn1* mutant (*foxn1*<sup>-/-</sup>) embryos.

(C) Quantification of protein levels in (B) (mean ± SD, t test; \*\*\*p < 0.001, n = 3 in each group).

(D) The *foxn1* mRNA level in 5 dpf WT, *foxn1*<sup>+/-</sup>, and *foxn1*<sup>-/-</sup> embryos was detected by qRT-PCR (mean ± SD, one-way ANOVA, Tukey's; N.S., nonsignificant; \*\*\*p < 0.001; n = 3 in each group).

(E) Whole-mount *in situ* hybridization data showing the developmental phenotype of early T cells, marked by *rag1*, *ccr9a*, and *lck*. The red circles and red arrows indicate the lateral and dorsal views of the thymus region, respectively. Scale bar, 100 μm.

(F) H&E staining of 3-month-old thymus sections. The blue arrows and dashed lines denote the thymus region. Original magnification: left (4×), right (10×). Scale bar, 100 μm.

(G) QRT-PCR analysis to detect the expression of differentiated hematopoietic cell markers in the kidney marrow (KM). T and B cell receptor rearrangement genes *rag1* and *rag2*; mature T cell markers *lck*, *tcrα*, and *tcrβ*; mature B cell markers *igm*, *igz*, *pax5*, and *cd37*; natural killer cell marker *il2rb*; myeloid markers *lyz* and *mpo* (mean ± SD, t test; N.S., nonsignificant; \*p < 0.05, \*\*p < 0.01; n = 3 in each group).

(H) Flow-cytometric analysis of different blood cell types in adult WT, *foxn1*<sup>+/-</sup>, and *foxn1*<sup>-/-</sup> KMs. Each circle and percentage represents a different cell lineage (I, erythrocyte; II, myelocyte; III, lymphocyte; and IV, precursor). Total cell numbers in whole KMs are indicated (mean ± SD, n [WT] = 5, n [*foxn1*<sup>+/-</sup>] = 6, n [*foxn1*<sup>-/-</sup>] = 5).

(legend continued on next page)

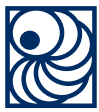

(Figures 2B and S2D and Table S2). At 2 h post transplantation, CD41-GFP<sup>lo</sup> cells were readily observed in the head and tail region (Figure S2E).

The engraftment efficiency of CD41-GFP<sup>lo</sup> HSCs was evaluated at 60 days post transplantation (dpt), and the GFP<sup>+</sup> cells could be directly observed in the KM of *foxn1/Casper* mutants, but not in *Casper* recipients (Figure 2C). In addition, in the tail region, the individual CD41-GFP<sup>hi</sup> and CD41-GFP<sup>lo</sup> cells could be also visualized by confocal imaging (Figure 2D). Moreover, the flow-cytometric analysis showed that the engrafted CD41-GFP<sup>+</sup> cells could be detected in recipient KM (Figure 2E). The analysis of the percentage of CD41-GFP<sup>+</sup> cells in KM at 60 dpt showed that HSC engraftment efficiencies in irradiated *Casper* and nonirradiated *foxn1/Casper* mutants were comparable, but were both higher than that in *Casper*, indicating that the nonirradiated *foxn1/Casper* mutant recipient is feasible for HSCT (Figure 2F). Finally, to compare the lineage distributions in irradiated *Casper* and nonconditioned *foxn1/Casper* after HSCT, we performed HSCT with *ubi-dsRed*<sup>+</sup>/CD41-GFP<sup>+</sup> cells. We found that the frequency of erythroid, myeloid, and precursor lineages, but not lymphocytes, in nonconditioned *foxn1/Casper* was comparable to that in irradiated *Casper* after transplantation, indicating that the lymphoid population failed to reestablish due to the defective thymus (Figures S2F and S2G). Taken together, the *foxn1/Casper* mutant without irradiation can be used to observe donor-derived cells *in vivo* post transplantation. Therefore, our following studies involved in cell transplantation employed *Casper* and nonirradiated *foxn1/Casper* mutants as recipients.

### Fetal HSCs Possess More Robust Engraftment Ability Than Adult HSCs

Given that the fetal- and adult-derived HSCs displayed substantial differences in self-renewal, lineage distribution, and gene expression (Bowie et al., 2007), HSCs at different stages may have distinct transplant outcomes in clinical trials. To compare the engraftment abilities of HSCs derived from different developmental stages, we transplanted fetal HSCs (3 dpf trunk region) and adult KM HSCs (3 months post fertilization [mpf]) into adult *Casper* and *foxn1/Casper* mutants, respectively (Figure 3A). The fetal and adult *ubi-dsRed*<sup>+</sup>/CD41-GFP<sup>lo</sup> HSCs were harvested from Tg (*ubi:dsRed*/CD41:GFP) (Figure S3A). After transplantation of  $1 \times 10^4$  donor-derived *ubi-dsRed*<sup>+</sup>/CD41-GFP<sup>lo</sup> HSCs

into corresponding recipients for 2 months, the transplant outcomes were evaluated (Table S3). The results showed that the percentage of fetal HSC-derived cells (*ubi-dsRed*<sup>+</sup> cells) was significantly higher than that of adult HSC-derived cells (*ubi-dsRed*<sup>+</sup> cells) in *foxn1/Casper* recipients (Figures 3B and 3C). We also analyzed the long-term transplantation outcomes of fetal and adult HSCs at 90 dpt, and the result showed a higher engraftment efficiency of fetal HSCs compared with adult HSCs (Figure S3B). Importantly, the percentage of fetal-derived *ubi-dsRed*<sup>+</sup>/CD41-GFP<sup>+</sup> cells in recipient KM was higher than that of adult-derived cells, indicating a robust self-renewal ability of fetal HSCs (Figures 3D and 3E). However, the erythroid, myeloid, and lymphoid differentiation of engrafted fetal HSCs was comparable to that of adult HSCs (Figures S3B–S3D). Notably, zebrafish fetal HSCs showed higher engraftment efficiency than adult HSCs, which was consistent with previous findings in mouse (Arora et al., 2014; Bowie et al., 2007).

To study the underlying mechanism, we analyzed our recent bulk RNA-sequencing (RNA-seq) data of sorted fetal and adult HSCs (Xue et al., 2019). The analytic results showed that 3,158 and 1,342 genes were upregulated and downregulated in fetal HSCs, respectively (Figures S3E and S3F). Heatmap analysis revealed that the expression of genes related to cell proliferation and cell-cycle progression in fetal HSCs was much higher than that in adult HSCs (Figure 3F). In addition, gene ontology analysis indicated that most upregulated genes were enriched in “cell cycle” and “cell division” terms (Figure S3G). To further validate this result, we detected the expression of cell-cycle genes in sorted fetal and adult CD41-GFP<sup>lo</sup> HSCs by qRT-PCR. Compared with adult HSCs, the fetal HSCs displayed higher expression levels of cell-cycle-promoting genes (*ccna1*, *ccnb1*, *ccne*, *ccnd1*, *ccnh*, *cdk1*, *cdk2*, *cdk7*, *cdc20*, and *pcna*), but lower expression levels of cell-cycle-inhibiting genes (*cdkn1a* and *cdkn1b*) (Figure 3G). Taken together, these results showed that fetal HSCs harbor stronger cell-cycle activity than adult HSCs, partially explaining why fetal HSCs exhibit higher engraftment efficiency than adult HSCs.

### Allograft and Xenograft of Muscle Cells in *foxn1/Casper* Mutants

To study whether the *foxn1/Casper* mutants can engraft other cells than HSCs, we tried to transplant muscle cells into the mutants. First, zebrafish muscle cells were isolated

(I) Quantification of different blood lineages in the KMs based on (H) (mean  $\pm$  SD, one-way ANOVA, Tukey's; \* $p < 0.05$ , \*\*\* $p < 0.001$ ; n [WT] = 4, n [*foxn1*<sup>+/-</sup>] = 5, n [*foxn1*<sup>-/-</sup>] = 3).

(J) Reverse-transcription PCR analysis of *tcrb* and *igm* rearrangements of KM cells in WT and *foxn1* mutant. The variable (V) and constant (C) regions of *tcrb* transcripts and the variable H (VH) and constant mu (C $\mu$ ) regions of *igm* transcripts were detected by specific primers. Elongation factor 1 alpha (*elf1a*) is a positive control. n (WT) = 2, n (*foxn1*<sup>-/-</sup>) = 6.

See also Figure S1.

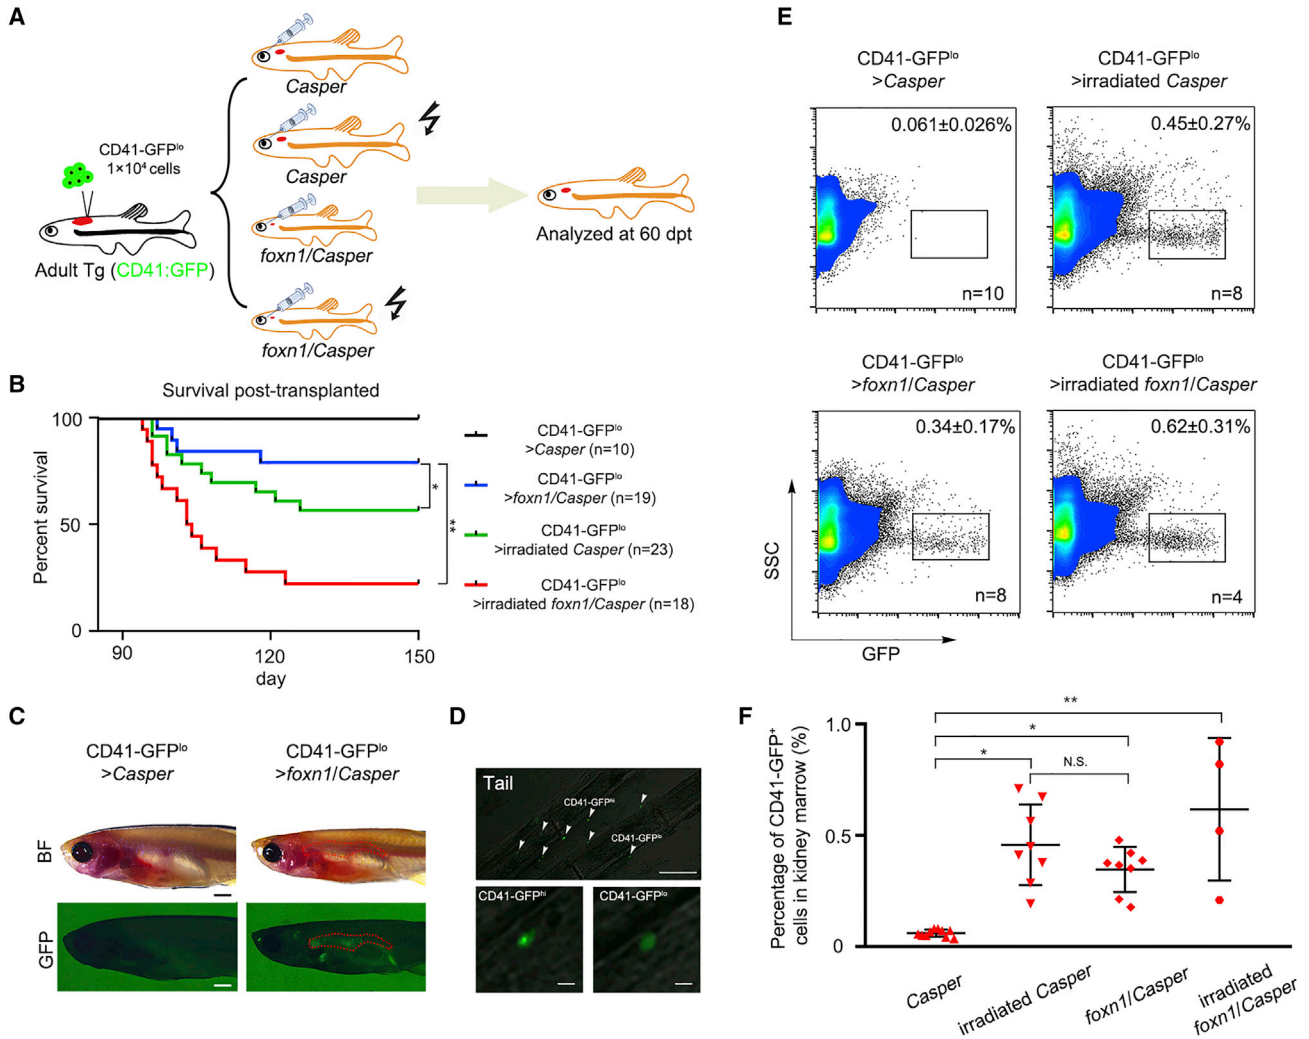

**Figure 2. *foxn1/Casper* Mutant Engrafts HSCs without Irradiation**

(A) Schematic representation of the workflow of HSC transplantation. CD41-GFP<sup>lo</sup> cells were sorted from the KM of Tg (CD41:GFP), and 1 × 10<sup>4</sup> CD41-GFP<sup>lo</sup> cells were injected into each recipient (*Casper*, 25-Gy-irradiated *Casper*, *foxn1/Casper*, and 15-Gy-irradiated *foxn1/Casper*).

(B) The survival rate of each recipient at 60 days post transplantation (dpt). The irradiated *foxn1/Casper* showed a low survival rate after transplantation (data presented as days-percentage survival, t test; \*p < 0.05, \*\*p < 0.01; n (CD41-GFP<sup>lo</sup> > *Casper*) = 10, n (CD41-GFP<sup>lo</sup> > irradiated *Casper*) = 19, n (CD41-GFP<sup>lo</sup> > *foxn1/Casper*) = 23, and n (CD41-GFP<sup>lo</sup> > irradiated *foxn1/Casper*) = 18).

(C) Imaging of representative recipients at 60 dpt. CD41-GFP<sup>+</sup> cells could be visualized under a GFP field in the KM of nonirradiated *foxn1/Casper* mutant. The red dashed lines indicate the KM regions. n = 5; scale bar, 1 mm (kidney).

(D) Confocal imaging of engrafted CD41-GFP<sup>+</sup> cells at 60 dpt in tail region. White arrows indicate the CD41-GFP<sup>hi</sup> and CD41-GFP<sup>lo</sup> cells (top), and two magnified pictures show the CD41-GFP<sup>hi</sup> and CD41-GFP<sup>lo</sup> cells, respectively (bottom). Scale bar, 100 μm (top), 10 μm (bottom).

(E) Representative flow-cytometric analysis of recipient KM at 60 dpt. The dots in the rectangles indicate engrafted CD41-GFP<sup>+</sup> cells (mean ± SD, n [CD41-GFP<sup>lo</sup> > *Casper*] = 10, n [CD41-GFP<sup>lo</sup> > irradiated *Casper*] = 8, n [CD41-GFP<sup>lo</sup> > *foxn1/Casper*] = 8, and n [CD41-GFP<sup>lo</sup> > irradiated *foxn1/Casper*] = 4).

(F) The statistical analysis of (E) (mean ± SD, one-way ANOVA, Tukey's; N.S., nonsignificant; \*p < 0.05, \*\*p < 0.01). See also Figure S2.

from Tg (*ubi:dsRed/fmyhc2:GFP*) and transplanted into *Casper* and *foxn1/Casper* mutants by intramuscular injection. The *ubi-dsRed<sup>+</sup>/fmyhc2-GFP<sup>+</sup>* cells could be detected

at 15 and 30 dpt in *foxn1/Casper* mutants, but not in *Casper* recipients (Figures S4A–S4C). Moreover, the transplanted muscle cells could also be imaged at 60 dpt in *foxn1/Casper*

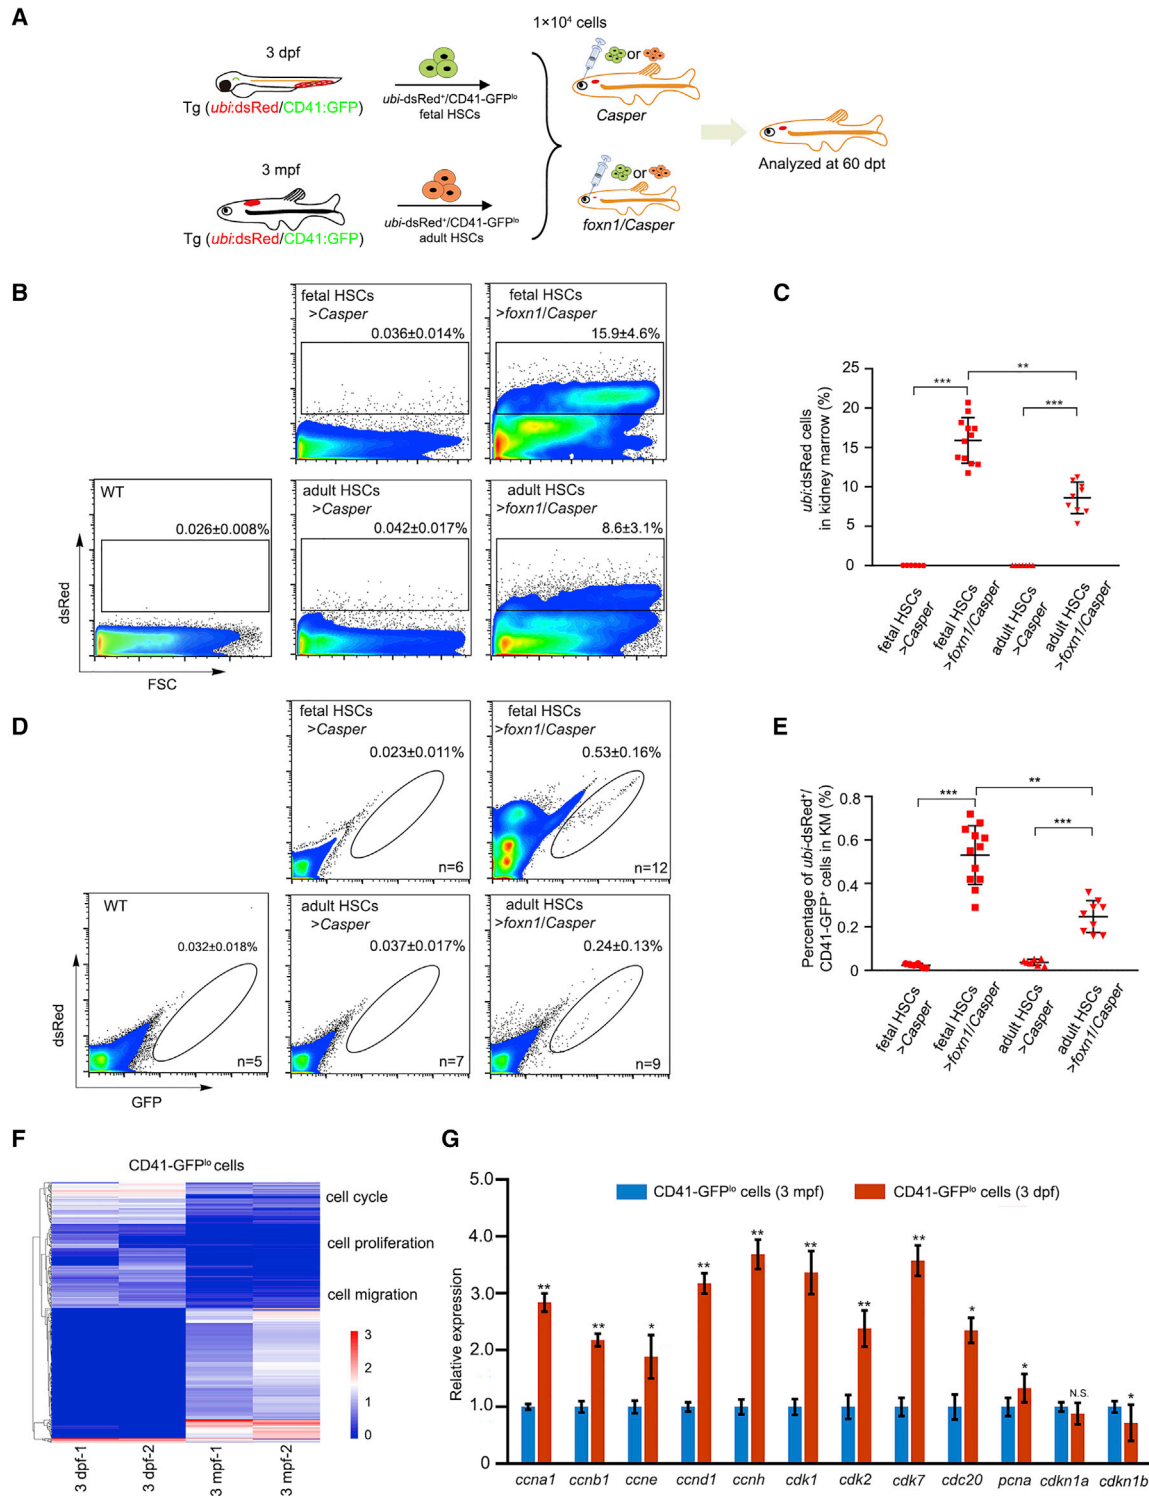

### Figure 3. The Comparison of Transplant Outcomes in Fetal and Adult HSCs

(A) A schematic of the fetal and adult HSC transplantation assay. Fetal and adult donor HSCs were derived from Tg (*ubi:dsRed/CD41:GFP*) at 3 dpf in the trunk region and 3 mpf in the KM region, respectively. Recipients were 3-month-old *Casper* and *foxn1/Casper* mutants. (B) Flow-cytometric analysis of engrafted *ubi:dsRed*<sup>+</sup> cells in the recipient KM at 60 dpt (mean ± SD; n [WT] = 5, n [fetal HSCs > *Casper*] = 6, n [fetal HSCs > *foxn1/Casper*] = 12, n [adult HSCs > *Casper*] = 7, and n [adult HSCs > *foxn1/Casper*] = 9).

(legend continued on next page)



recipients (Figure S4D). Collectively, the data showed that the *foxn1/Casper* mutant can engraft allogeneic muscle cells and serve as a great model for direct visualization of transplanted cells *in vivo*.

Given that the *foxn1/Casper* mutant is an efficient transplantation platform for allogeneic cells, we wondered whether the *foxn1/Casper* mutant is also suitable for xenograft. Medaka, which has a distant evolutionary relationship with zebrafish, was selected as a xenograft donor. Equivalent numbers of muscle cells derived from medaka Tg (*ubi:mCherry*) were transplanted into *Casper* and *foxn1/Casper* mutants, respectively. The results showed that the medaka mCherry<sup>+</sup> muscle cells remained engrafted beyond 30 days and the muscle fibers could be observed directly (Figures S4E and S4F). Taken together, the results show that the *foxn1/Casper* mutant can be engrafted with medaka muscle, suggesting that it is a feasible tool for xenografting in future study.

#### Allograft of MDS-like Cells in *foxn1/Casper* Mutants

Cell transplantation has been applied to monitor the dynamic changes of malignant cells (Yan et al., 2019). To demonstrate whether the *foxn1/Casper* mutant permits the transplantation of malignant cells, we transplanted myelodysplastic syndrome-like (MDS-like) cells from adult Tg (*cmyb<sup>hyper</sup>:GFP*) zebrafish (Liu et al., 2017). The MDS-like zebrafish were first selected based on their pathologic external features at 24 mpf (Figure 4A). Flow-cytometric analysis showed that the percentage of myelocytes in MDS-like zebrafish KM was significantly higher than that in WT (no transgenic background) and siblings, whereas other blood lineages showed a decrease in MDS-like zebrafish KM (Figures 4B and 4C), indicating a myelodysplasia phenotype. Next, KM cells were harvested from siblings and MDS-like zebrafish for transplantation. At 30 dpt, the MDS-like *cmyb<sup>hyper</sup>:GFP<sup>+</sup>* cells proliferated robustly in *foxn1/Casper* mutants, while they could not be detected in *Casper* recipients (Figure 4D). We also studied the survival of MDS-like cell-transplanted *foxn1/Casper* recipients, and the survival rates were 43.3% (26/60), 20% (12/60), and 8.3% (5/60) at 30, 45, and 60 dpt, respectively. To further characterize the MDS-like phenotype of the engrafted cells, we analyzed recipient KM and detected a significantly higher percentage of myelocytes in MDS-like

*cmyb<sup>hyper</sup>:GFP<sup>+</sup>* cell-engrafted KM compared with that in sibling *cmyb<sup>hyper</sup>:GFP<sup>+</sup>* cell-engrafted KM (Figure 4E). Moreover, we performed cytological analysis of recipient KM using Wright-Giemsa staining, and the results showed that myelocytes exhibited enlarged cell size and increased cell granularity, which resembled the MDS-like phenotype (Figure 4F). These data suggest that *foxn1/Casper* mutants could be engrafted with allogeneic MDS-like cells.

## DISCUSSION

Here we established a *foxn1/Casper* zebrafish mutant with the characteristics of immunodeficiency and optical transparency. By comparing the HSC engraftment efficiency of *foxn1/Casper* mutants with irradiated *Casper* and irradiated *foxn1/Casper* mutants, we found that the *foxn1/Casper* mutants displayed engraftment efficiency comparable to that of irradiated *Casper*. Although irradiated *foxn1/Casper* mutants exhibited the highest engraftment efficiency, their low survival rate makes them unsuitable for serving as recipients. Moreover, we found that fetal HSCs gave rise to higher transplant outcomes than adult HSCs, and the conserved transplant outcome of fetal HSCs between zebrafish and mice (Arora et al., 2014) demonstrated that fetal HSCs are more suitable for transplantation compared with adult HSCs. Furthermore, we could directly observe the transplanted MDS-like and muscle cells in real time in living *foxn1/Casper* mutants, which provides a potential platform to study therapeutic strategies for blood disease and solid tumors.

The engraftment ability is a gold standard for the functional evaluation of HSCs, and HSCT is a widely used approach for this purpose. In mammals, the donor HSCs used in primary HSCT are often from the adult bone marrow (BM). Later, fetal HSCs were also shown to be capable of long-term multilineage engraftment ability, yet the engraftment efficiency was low (Bertrand et al., 2005; North et al., 2002). Previous studies have compared the functional differences between fetal and adult HSCs and the results demonstrated that fetal HSCs reconstitute more efficiently than BM HSCs in adult recipients (Arora et al., 2014; Bowie et al., 2007). In the present study, we found that the engraftment efficiency of fetal HSCs was higher in adult recipients than that of adult HSCs,

(C) Statistical analysis of (B) (mean ± SD, two-way ANOVA, Tukey's; \*\*p < 0.01, \*\*\*p < 0.001).

(D) Flow-cytometric analysis of engrafted fetal and adult HSC in recipient KM (mean ± SD; n [WT] = 5, n [fetal HSCs > *Casper*] = 6, n [fetal HSCs > *foxn1/Casper*] = 12, n [adult HSCs > *Casper*] = 7, and n [adult HSCs > *foxn1/Casper*] = 9).

(E) The statistical analysis of engraftment efficiency in (D) (mean ± SD, two-way ANOVA, Tukey's; \*\*p < 0.01, \*\*\*p < 0.001).

(F) Heatmap analysis of selected genes based on transcriptome data of fetal and adult CD41-GFP<sup>lo</sup> cells.

(G) QRT-PCR analysis of the expression level of cell-cycle genes in fetal and adult CD41-GFP<sup>lo</sup> cells (mean ± SD, t test; N.S., nonsignificant; \*p < 0.05, \*\*p < 0.01; n = 3 in each group).

See also Figure S3.

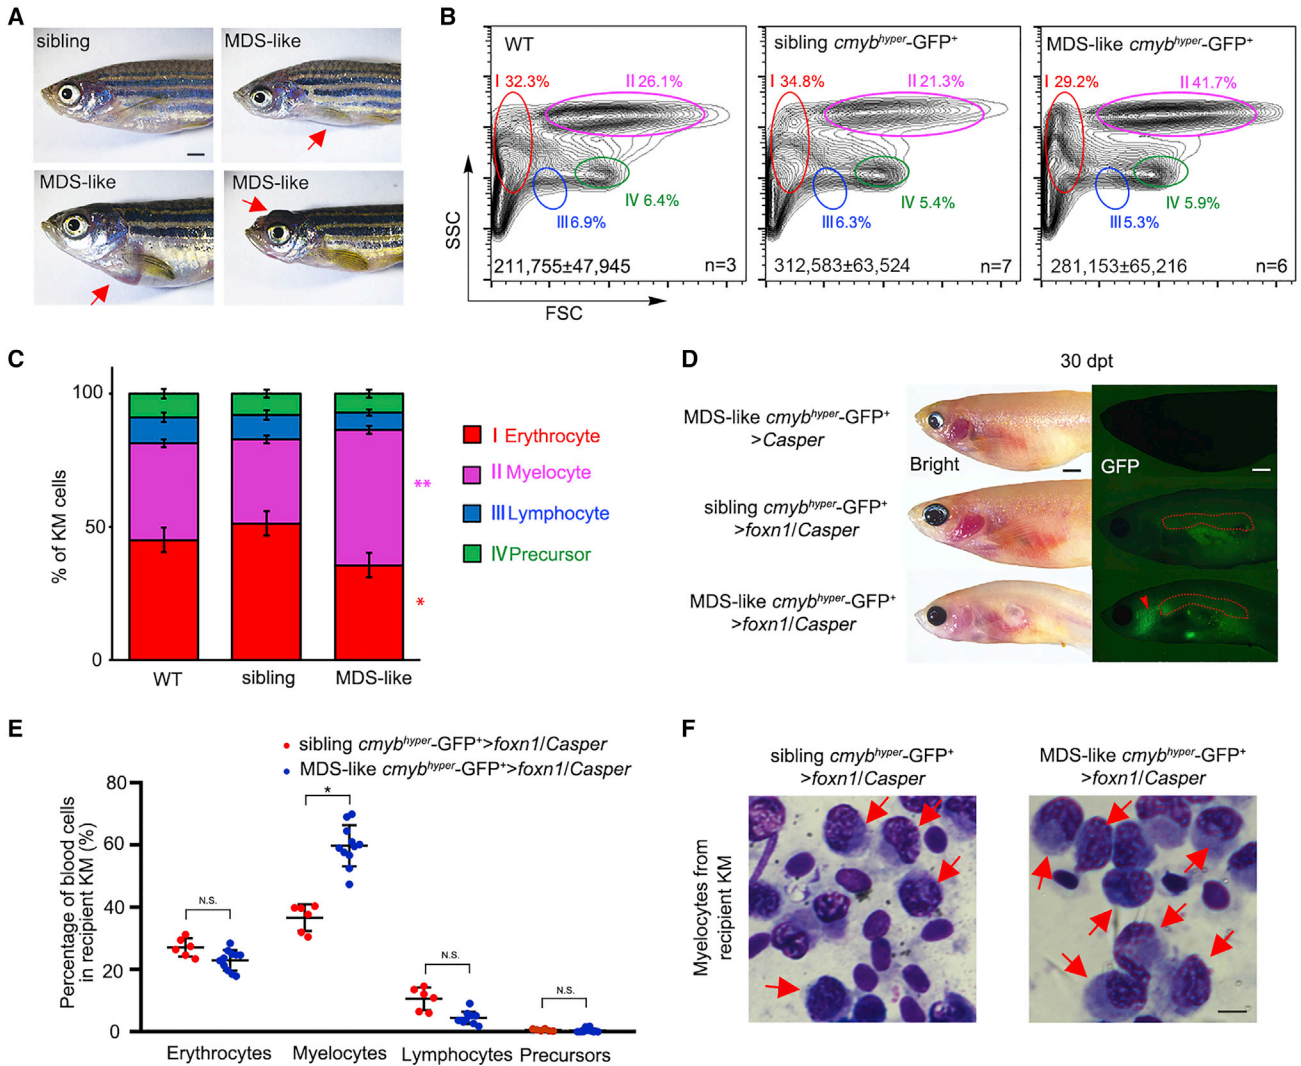

**Figure 4. Allogeneic MDS-like Cell Transplantation with Tg (*cmyb<sup>hyper</sup>:GFP*)**

(A) The pathologic external features of zebrafish Tg (*cmyb<sup>hyper</sup>:GFP*). Some of the transgenic zebrafish display MDS-like phenotypes (exophthalmos, cachexia, and abdominal mass). The red arrows denote diseased areas. Scale bar, 1 mm.

(B) Flow-cytometric analysis of 24-month-old WT (no transgenic background) and Tg (*cmyb<sup>hyper</sup>:GFP*) KM. The representative percentages of myelocytes in WT, siblings, and MDS-like zebrafish are indicated. Total cell numbers in whole KM are indicated (mean  $\pm$  SD; n [WT] = 3, n [siblings] = 7, n [MDS-like zebrafish] = 6).

(C) Statistical analysis of the percentage of different blood lineages in (B) (mean  $\pm$  SD, one-way ANOVA, Tukey's; \* $p$  < 0.05, \*\* $p$  < 0.01, n [WT] = 3, n [siblings] = 7, n [MDS-like zebrafish] = 6).

(D) Direct observation of engrafted MDS-like cells. At 30 dpt, MDS-like *cmyb<sup>hyper</sup>-GFP<sup>+</sup>* cells could be visualized in *foxn1/Casper* recipient KM, not in the *Casper*. The red dashed lines indicate the KM regions. The red arrow indicates the engrafted MDS-like *cmyb<sup>hyper</sup>-GFP<sup>+</sup>* cells in the head. n (*Casper*) = 0/10, n (*foxn1/Casper*) = 9/12. Scale bar, 1 mm.

(E) Statistical analysis of the percentage of different blood lineages in MDS-like and sibling *cmyb<sup>hyper</sup>-GFP<sup>+</sup>* cell-engrafted KMs. The *cmyb<sup>hyper</sup>-GFP<sup>+</sup>* cells in recipient KM were gated for analysis (mean  $\pm$  SD, t test; N.S., non-significant; \* $p$  < 0.05; n > 3 in each group).

(F) Wright-Giemsa staining of blood cells in recipient KM after MDS-like and sibling *cmyb<sup>hyper</sup>-GFP<sup>+</sup>* cell transplantation. The red arrows indicate the MDS-like myelocytes in recipients. Scale bar, 5  $\mu$ m.

consistent with the finding in mice. According to our RNA-seq data and qRT-PCR results, the cell-cycle activity was much higher in fetal HSCs than in adult HSCs, indicating

that the proliferating fetal HSCs are responsible for rapid reconstitution in HSCT. Taken together, these findings in zebrafish and mice might serve as a potential guideline in





that fetal HSCs are a preferential choice for successful HSCT.

In adult zebrafish, the opaque features limit its application for direct imaging of cell migration and other behaviors *in vivo*. Therefore, the widely used pigmentation mutant *Casper* is an optimized model to overcome this obstacle. The *in vivo* cell tracing post transplantation can be realized using the *foxn1/Casper* mutant. In this work, we could easily observe the fluorescence-labeled hematopoietic cells at 60 dpt. Dynamic changes in hematopoietic and muscle cells could be visualized, supporting that tracing cell migration in live adult zebrafish is feasible. Furthermore, we demonstrated that the allogeneic MDS-like cells could engraft efficiently in this newly generated *foxn1/Casper* mutant, supporting that it would be useful for tumor cell engraftment in the future, such as muscle-cell-related human rhabdomyosarcoma and sarcoma and blood-cell-related human acute myeloid leukemia and acute lymphoid leukemia. More importantly, the medaka muscle cells engrafted successfully in *foxn1/Casper* mutants, which indicates that the *foxn1/Casper* mutant could be used as an optimized xenograft model like the nude mouse. Unexpectedly, when we performed mouse HSCT using *foxn1/Casper* mutants, there was no detection of successful engraftment. We reasoned that this might be due to the incomplete immune deficiency of this mutant (still retaining B and NK cells), the distinct HSC niche, or the unmatched physiological temperatures (Yan et al., 2019) between mice and zebrafish.

In summary, we have demonstrated that the *foxn1/Casper* mutant is a feasible model to permit transplantation of HSCs, muscle cells, and MDS-like cells without irradiation preconditioning. Given the immunodeficiency and transparency of the *foxn1/Casper* mutant, this model can be further applied to study the physiological and pathological events of normal and malignant cells *in vivo*.

## EXPERIMENTAL PROCEDURES

### Zebrafish Lines

Zebrafish embryos were obtained via the natural spawning of adult zebrafish. Zebrafish adults were raised at 28.5°C in system water (conductivity at 500–550  $\mu\text{s}/\text{cm}$  and pH at 7.0–7.5), and the Tg (*rag2:dsRed*) line was kindly provided by Zilong Wen (Hong Kong University of Science and Technology, Hong Kong, China); Tg (CD41:GFP) (Ma et al., 2011), Tg (*cmyb<sup>hyper</sup>:GFP*) (Liu et al., 2017), Tg (*fmyhc2:GFP*) (Qiu et al., 2016), and Tg (*ubi:loxP-dsRed-loxP-GFP*) (here referred to Tg (*ubi:dsRed*)) lines (gifts from J.W. Xiong, Peking University, Beijing, China) were used as donors. The medaka Tg (*ubi:mCherry*) line (National BioResource Project, Medaka; unpublished) was used for xenografts. The *foxn1/Casper* mutant was obtained through outcrossing a *foxn1* mutant with the *Casper* line (White et al., 2008). *Casper*, irradiated *Casper*, and

*foxn1/Casper* were used as transplant recipients. Genotyped *foxn1/Casper* mutants and all the transplanted recipients were kept in sterilized fish water supplemented with penicillin (100 units/mL) and streptomycin (100  $\mu\text{g}/\text{mL}$ ) (Gibco, 15140122). The double-transgenic lines Tg (*ubi:dsRed/CD41:GFP*) and Tg (*ubi:dsRed/fmyhc2:GFP*) were obtained through outcrossing of single-transgenic lines. This study was approved by the Ethical Review Committee of the Institute of Zoology, Chinese Academy of Sciences, China.

### Foxn1 Mutant Generation and Genotyping

Target-specific ZFN vectors for *foxn1* (Genebank: BX663513) were designed and synthesized as previously described (Kim et al., 2010). The target site sequence was CCATCAGTCCTCTACAA-CACCA. ZFN vectors were linearized with *PvuII* and capped mRNAs were synthesized using T7 RNA polymerase. Two to three nanograms of ZFN mRNA was injected into one-cell-stage embryos. For identification and genotyping of the *foxn1* mutant, we used the endonuclease *MnII* (New England Biolabs, R0163S) to detect heteroduplex formation after DNA denaturation and annealing. Primers used for genotyping were *foxn1* forward (5'-TTA-CACCTTCTAAAGAGGCTTG-3') and *foxn1* reverse (5'-TGACC-CAGTAAATGCAGCCTTG-3').

### Hematopoietic Stem Cell Transplantation

The donor cells (3-month-old adult HSCs) were obtained from the KM of Tg (*ubi:dsRed/CD41:GFP*). The detailed procedure was followed as previously reported (Tang et al., 2014). In this study, we utilized WT AB zebrafish whole KM cells as a negative control to gate *ubi:dsRed<sup>+</sup>/CD41-GFP<sup>lo</sup>* HSCs based on fluorescent colors. Staining with propidium iodide was used to exclude dead cells. Briefly, the donor fish were anesthetized with 0.01% tricaine (Sigma-Aldrich, A5040), and then the KM was taken out and placed in 1.5 mL tubes that contained 1 $\times$  PBS with 5% serum (Gibco, 10438026). The KM was dissected using 1 mL pipette tips. Then the cell suspension was filtered through 40  $\mu\text{m}$  filtering membrane and centrifuged for 8 min (1,000 rpm) before cell sorting and analysis. For fetal HSC collection, the trunk region of 3 dpf embryos was obtained from Tg (*ubi:dsRed/CD41:GFP*) using a 2 mL injection syringe and dispersed to a single-cell suspension using 0.5% trypsin. Then the cell suspension was filtered through a 40  $\mu\text{m}$  filtering membrane and centrifuged for 8 min (1,000 rpm) before cell sorting. The sorted cells were centrifuged for 8 min (1,000 rpm) and resuspended in proper volumes for transplantation. Recipient fish (3-month-old *Casper*, irradiated *Casper*, *foxn1/Casper* mutants, and irradiated *foxn1/Casper*) were first anesthetized with 0.01% tricaine and then irradiated using 25 Gy (*Casper*) or 15 Gy (*foxn1/Casper*). After 2 days, irradiated fish were used for transplantation. The cells were injected into recipients using a 26s-gauge Hamilton 80,366 syringe (Sigma-Aldrich, 20779) by retroorbital injection (Pugach et al., 2009).

The engraftment efficiency was assessed at 60 dpt. The photographs of whole adult fish were first taken using a Nikon SMZ1500, and the images of blood cells were taken using Nikon A1 confocal microscopy. Subsequently, the KM of recipients was analyzed using MoFlo XDP (Beckman) and the results were processed using FlowJo (10.5.0) and Summit (5.1.0) software.



FlowSight (Merck Millipore) was used for analysis of different hematopoietic lineages. The numbers of transplanted cells and recipients are provided in [Tables S2](#) and [S3](#).

### MDS-like Cell Transplantation

For MDS-like cell collection, the cells were obtained from the KM of Tg (*cmyb<sup>hyper</sup>*:GFP). The 24-month-old MDS-like fish were selected based on their pathologic external features, and the whole KM cells of Tg (*cmyb<sup>hyper</sup>*:GFP) were collected as described above. The whole KM cells were mixed from eight donors and centrifuged for 8 min (1,000 rpm) and resuspended. About  $5 \times 10^5$  cells were injected into each recipient using a 26s-gauge Hamilton 80,366 syringe by retroorbital injection. The 3-month-old *Casper* and *foxn1/Casper* mutant were used as recipients. Photographs of whole adult fish and KM were taken at 45 dpt using a Nikon SMZ1500. The KM of recipients was analyzed using MoFlo XDP (Beckman) and the results were processed using FlowJo and Summit software.

### Muscle Cell Transplantation

For muscle cell collection, the dorsal musculature was excised from anesthetized 3-month-old adult Tg (*ubi:dsRed/fmyhc2*:GFP) and medaka Tg (*ubi:mCherry*). The muscle tissue was obtained from 10 donors and dissected by maceration using razor blade and surgical scissors in 1× PBS with 5% serum and then suspended with a 5 mL serological pipette repeatedly. The cell suspension was filtered through a 40 μm filtering membrane and centrifuged for 8 min (1,000 rpm) twice and resuspended. The cell number was calculated by Trypan blue staining and hemocytometer counts. About  $1 \times 10^6$  (2–3 μL) muscle cells were injected into recipients using a 26s-gauge Hamilton 80,366 syringe (Sigma-Aldrich, 20779) by intramuscular injection ([Tenente et al., 2014](#)). The 3-month-old *Casper* and *foxn1/Casper* mutant were used as recipients. At 15 and 30 dpt, photographs of whole adult fish and muscle cells were taken using a Nikon SMZ1500 and Nikon A1 confocal microscopy.

### RNA-Seq and Gene Ontology Analysis

The caudal hematopoietic tissue region (3 dpf) and adult KM (3 mpf) were dissociated to single cells, and CD41-GFP<sup>lo</sup> cells were sorted by MoFlo XDP (Beckman). The total RNA of the sorted CD41-GFP<sup>lo</sup> cells was extracted and subjected to RNA-seq. The deep-sequencing service and gene ontology analysis were provided by Shanghai Institutes for Biological Sciences, Chinese Academy of Sciences.

### Data and Code Availability

The accession numbers for the data reported in this paper are GEO: GSM3403648, GSM3403649, GSM3403658, and GSM3403659.

### Whole-Mount *In Situ* Hybridization and Western Blotting

The zebrafish embryos (5 dpf) were collected and whole-mount *in situ* hybridization (WISH) was performed using a ZF-A4 *in situ* hybridization machine (Zfand, China) with probes of *rag1*, *ccr9a*, and *lck* as previously described ([Ma et al., 2012](#)). The photographs of WISH were taken using a Nikon SMZ1500. The thymus region of WT and *foxn1* mutants at 5 dpf were collected for protein sample

extraction. Foxn1 protein level was detected using the Foxn1 antibody (AbMax, DWS008) recognizing the RESDPYSQKSAERFRR-SEPQESSEE peptide and following the protocol as previously described ([Ma et al., 2012](#)).

### Quantitative Real-Time PCR

Total RNA used for qRT-PCR was extracted from 5 dpf zebrafish embryos and 3-month-old adult KM. Total RNA was extracted using TRIzol reagent (Invitrogen, 15596018) and was reverse transcribed (Promega, GoScript Reverse Transcription System kit A5000). The mRNA levels of target genes were analyzed in this assay. The qRT-PCR primers were used as previously reported ([Tang et al., 2014](#)) and are listed in [Table S3](#).

### *Tcrb* and *igm* Rearrangement Assessment

The total RNA was collected from 3-month-old adult KM and then reverse transcribed (Promega, GoScript Reverse Transcription System kit A5000). The PCR primers used for detection and the amplification procedure were previously reported ([Tang et al., 2014](#)). Here *elf1a* was a positive control. The zebrafish numbers of WT and *foxn1* mutants for each group were 2 and 6, respectively.

### Wright-Giemsa Staining and Hematoxylin and Eosin Staining

Zebrafish blood cells were collected from KM or peripheral blood and were smeared on the slides. The slides were dried at 37°C overnight. Wright-Giemsa staining was carried out to label different blood cell lineages according to the standard protocol. The adult tissues were fixed with 4% polyformaldehyde overnight and dehydrated using anhydrous ethanol. Then the tissues were embedded in paraffin. The paraffin sections of kidney and thymus were cut using a LEICA RM2255 and the thickness of each section was 10 μm. Then the H&E staining of thymus was performed as described previously ([Zhang et al., 2015](#)). The H&E staining was acquired using a Nikon ECLIPSE 80i.

### Statistical Analysis

Original photos were transformed into 8-bit grayscale images by ImageJ 1.8.0, and the area of the digitized region was analyzed. Data in each chart are presented as the mean ± SD (standard deviation), and Student's t test, one-way ANOVA (Tukey's), and two-way ANOVA (Tukey's) were used for statistical analysis;  $p < 0.05$  was statistically significant (\* $p < 0.05$ , \*\* $p < 0.01$ , \*\*\* $p < 0.001$ ). All statistical analysis was carried out using SPSS 20.0 and Prism 7.05.

### SUPPLEMENTAL INFORMATION

Supplemental Information can be found online at <https://doi.org/10.1016/j.stemcr.2020.07.020>.

### AUTHOR CONTRIBUTIONS

P.L., S.G., and G.L. performed all experiments; Y.B., J.C., and C.K. provided the *foxn1* mutant; D.M., Y.Z., S.G., and L.W. contributed to the editing; F.L. conceived the project, analyzed the data, and wrote the paper. All authors read and approved the final manuscript.



## ACKNOWLEDGMENTS

We thank our lab members for helpful discussions and critical reading of the paper. We thank Jing-Wei Xiong for providing the zebrafish Tg (*ubi:loxP-dsRed-loxP-GFP*) line, Anming Meng for the zebrafish Tg (*fmyhc2:GFP*) line, and Qiang Tu for the medaka Tg (*ubi:mCherry*) line. This work was supported by grants from the National Key Research and Development Program of China, China (2018YFA0800200, 2018YFA0801000, 2016YFA0100500), the Strategic Priority Research Program of the Chinese Academy of Sciences, China (XDA16010207), the National Natural Science Foundation of China, China (31830061, 31425016, 81530004), and the Youth Innovation Promotion Association, CAS, China (2016083). Y.-K.B. was supported by a National Cancer Center grant, Korea (NCC1310860).

Received: February 5, 2020

Revised: July 27, 2020

Accepted: July 27, 2020

Published: August 20, 2020

## REFERENCES

- Arora, N., Wenzel, P.L., McKinney-Freeman, S.L., Ross, S.J., Kim, P.G., Chou, S.S., Yoshimoto, M., Yoder, M.C., and Daley, G.Q. (2014). Effect of developmental stage of HSC and recipient on transplant outcomes. *Dev. Cell* *29*, 621–628.
- Barriga, F., Ramirez, P., Wietstruck, A., and Rojas, N. (2012). Hematopoietic stem cell transplantation: clinical use and perspectives. *Biol. Res.* *45*, 307–316.
- Becker, A.J., Mc, C.E., and Till, J.E. (1963). Cytological demonstration of the clonal nature of spleen colonies derived from transplanted mouse marrow cells. *Nature* *197*, 452–454.
- Bertrand, J.Y., Giroux, S., Golub, R., Klaine, M., Jalil, A., Boucontet, L., Godin, I., and Cumano, A. (2005). Characterization of purified intraembryonic hematopoietic stem cells as a tool to define their site of origin. *Proc. Natl. Acad. Sci. U S A* *102*, 134–139.
- Bowie, M.B., Kent, D.G., Dykstra, B., McKnight, K.D., McCaffrey, L., Hoodless, P.A., and Eaves, C.J. (2007). Identification of a new intrinsically timed developmental checkpoint that reprograms key hematopoietic stem cell properties. *Proc. Natl. Acad. Sci. U S A* *104*, 5878–5882.
- Fogh, J., Fogh, J.M., and Orfeo, T. (1977). One hundred and twenty-seven cultured human tumor cell lines producing tumors in nude mice. *J. Natl. Cancer Inst.* *59*, 221–226.
- Jill, L.O., de Jong, C.E.B., Chen, A.T., Pugach, E., Mayhall, E.A., Alexandra, Smith, C.H., Feldman, H.A., Zhou, Y., and Zon, L.I. (2011). Characterization of immune-matched hematopoietic transplantation in zebrafish. *Blood* *117*, 4234–4242.
- Kapp, F.G., Perlin, J.R., Hagedorn, E.J., Gansner, J.M., Schwarz, D.E., O'Connell, L.A., Johnson, N.S., Amemiya, C., Fisher, D.E., Wolffe, U., et al. (2018). Protection from UV light is an evolutionarily conserved feature of the haematopoietic niche. *Nature* *558*, 445–448.
- Kim, J.S., Lee, H.J., and Carroll, D. (2010). Genome editing with modularly assembled zinc-finger nucleases. *Nat. Methods* *7*, 91–92.
- Li, P., White, R.M., and Zon, L.I. (2011). Transplantation in zebrafish. *Methods Cell Biol.* *105*, 403–417.
- Liu, W., Wu, M., Huang, Z., Lian, J., Chen, J., Wang, T., Leung, A.Y.H., Liao, Y., Zhang, Z., Liu, Q., et al. (2017). c-myb hyperactivity leads to myeloid and lymphoid malignancies in zebrafish. *Leukemia* *31*, 222–233.
- Ma, D., Zhang, J., Lin, H.F., Italiano, J., and Handin, R.I. (2011). The identification and characterization of zebrafish hematopoietic stem cells. *Blood* *118*, 289–297.
- Ma, D.Y., Wang, L., Wang, S.F., Gao, Y., Wei, Y.L., and Liu, F. (2012). Foxn1 maintains thymic epithelial cells to support T-cell development via mcm2 in zebrafish. *Proc. Natl. Acad. Sci. U S A* *109*, 21040–21045.
- Mantel, C.R., O'Leary, H.A., Chitteti, B.R., Huang, X., Cooper, S., Hangoc, G., Brustovetsky, N., Srouf, E.F., Lee, M.R., Messina-Graham, S., et al. (2015). Enhancing hematopoietic stem cell transplantation efficacy by mitigating oxygen shock. *Cell* *161*, 1553–1565.
- Moore, J.C., and Langenau, D.M. (2016). Allograft cancer cell transplantation in zebrafish. *Adv. Exp. Med. Biol.* *916*, 265–287.
- Moore, J.C., Tang, Q., Yordán, N.T., Moore, F.E., Garcia, E.G., Lobbardi, R., Ramakrishnan, A., Marvin, D.L., Anselmo, A., Sadreyev, R.I., and Langenau, D.M. (2016). Single-cell imaging of normal and malignant cell engraftment into optically clear *prkdc*-null SCID zebrafish. *J. Exp. Med.* *213*, 2575–2589.
- North, T.E., de Bruijn, M.F., Stacy, T., Talebian, L., Lind, E., Robin, C., Binder, M., Dzierzak, E., and Speck, N.A. (2002). Runx1 expression marks long-term repopulating hematopoietic stem cells in the midgestation mouse embryo. *Immunity* *16*, 661–672.
- Pugach, E.K., Li, P., White, R., and Zon, L. (2009). Retro-orbital injection in adult zebrafish. *J. Vis. Exp.* *2009*, 1645.
- Qiu, J., Fan, X., Wang, Y., Jin, H., Song, Y., Han, Y., Huang, S., Meng, Y., Tang, F., and Meng, A. (2016). Embryonic hematopoiesis in vertebrate somites gives rise to definitive hematopoietic stem cells. *J. Mol. Cell Biol.* *8*, 288–301.
- Romano, R., Palamaro, L., Fusco, A., Iannace, L., Maio, S., Vigliano, I., Giardino, G., and Pignata, C. (2012). From murine to human nude/SCID: the thymus, T-cell development and the missing link. *Clin. Dev. Immunol.* *2012*, 467101.
- Shultz, L.D., Ishikawa, F., and Greiner, D.L. (2007). Humanized mice in translational biomedical research. *Nat. Rev. Immunol.* *7*, 118–130.
- Szadvari, I., Krizanova, O., and Babula, P. (2016). Athymic nude mice as an experimental model for cancer treatment. *Physiol. Res.* *65*, S441–S453.
- Tang, Q., Abdelfattah, N.S., Blackburn, J.S., Moore, J.C., Martinez, S.A., Moore, F.E., Lobbardi, R., Tenente, I.M., Ignatius, M.S., Berman, J.N., et al. (2014). Optimized cell transplantation using adult *rag2* mutant zebrafish. *Nat. Methods* *11*, 821–824.
- Tay, G.K., Witt, C.S., Christiansen, F.T., Charron, D., Baker, D., Herrmann, R., Smith, L.K., Diepeveen, D., Mallal, S., McCluskey, J., et al. (1995). Matching for Mhc haplotypes results in improved survival following unrelated bone-marrow transplantation. *Bone Marrow Transpl.* *15*, 381–385.



- Tenente, I.M., Tang, Q., Moore, J.C., and Langenau, D.M. (2014). Normal and malignant muscle cell transplantation into immune compromised adult zebrafish. *J. Vis. Exp.* *94*, 52597.
- Thomas, E.D., Buckner, C.D., Rudolph, R.H., Fefer, A., Storb, R., Neiman, P.E., Bryant, J.I., Chard, R.L., Clift, R.A., Epstein, R.B., et al. (1971). Allogeneic marrow grafting for hematologic malignancy using hl-a matched donor-recipient sibling pairs. *Blood J. Hematol.* *38*, 267–287.
- Traver, D., Paw, B.H., Poss, K.D., Penberthy, W.T., Lin, S., and Zon, L.I. (2003). Transplantation and in vivo imaging of multilineage engraftment in zebrafish bloodless mutants. *Nat. Immunol.* *4*, 1238–1246.
- Traver, D., Winzeler, A., Stern, H.M., Mayhall, E.A., Langenau, D.M., Kutok, J.L., Look, A.T., and Zon, L.I. (2004). Effects of lethal irradiation in zebrafish and rescue by hematopoietic cell transplantation. *Blood* *104*, 1298–1305.
- Trounson, A., and McDonald, C. (2015). Stem cell therapies in clinical trials: progress and challenges. *Cell Stem Cell* *17*, 11–22.
- White, R.M., Sessa, A., Burke, C., Bowman, T., LeBlanc, J., Ceol, C., Bourque, C., Dovey, M., Goessling, W., Burns, C.E., et al. (2008). Transparent adult zebrafish as a tool for in vivo transplantation analysis. *Cell Stem Cell* *2*, 183–189.
- Wu, A.M., Till, J.E., Siminovitch, L., and McCulloch, E.A. (1967). A cytological study of the capacity for differentiation of normal hemopoietic colony-forming cells. *J. Cell. Physiol.* *69*, 177–184.
- Xue, Y., Liu, D., Cui, G., Ding, Y., Ai, D., Gao, S., Zhang, Y., Suo, S., Wang, X., Lv, P., et al. (2019). A 3D atlas of hematopoietic stem and progenitor cell expansion by multi-dimensional RNA-seq analysis. *Cell Rep.* *27*, 1567–1578.e5.
- Yan, C., Brunson, D.C., Tang, Q., Do, D., Iftimia, N.A., Moore, J.C., Hayes, M.N., Welker, A.M., Garcia, E.G., Dubash, T.D., et al. (2019). Visualizing engrafted human cancer and therapy responses in immunodeficient zebrafish. *Cell* *177*, 1903–1914.e4.
- Zhang, P., He, Q., Chen, D., Liu, W., Wang, L., Zhang, C., Ma, D., Li, W., Liu, B., and Liu, F. (2015). G protein-coupled receptor 183 facilitates endothelial-to-hematopoietic transition via Notch1 inhibition. *Cell Res.* *25*, 1093–1107.
- Zhou, B.O., Yu, H., Yue, R., Zhao, Z.Y., Rios, J.J., Naveiras, O., and Morrison, S.J. (2017). Bone marrow adipocytes promote the regeneration of stem cells and haematopoiesis by secreting SCF. *Nat. Cell Biol.* *19*, 891–903.

**Stem Cell Reports, Volume 15**

**Supplemental Information**

**Generation of *foxn1/Casper* Mutant Zebrafish for Allograft and Xenograft of Normal and Malignant Cells**

**Peng Lv, Dongyuan Ma, Shuai Gao, Yifan Zhang, Young-Ki Bae, Guixian Liang, Suwei Gao, Jung-Hwa Choi, Cheol-Hee Kim, Lu Wang, and Feng Liu**

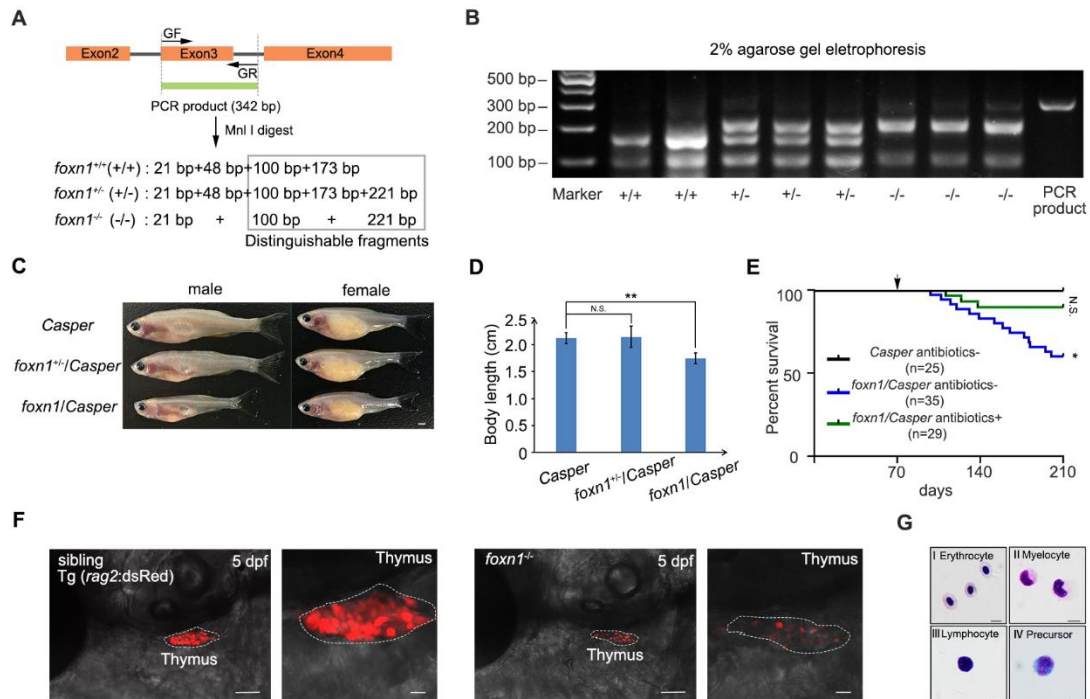

**Figure S1**

**The Characterization of *foxn1/Casper* Mutant. Related to Figure 1**

(A) Schematic representation of *foxn1* mutant genotyping. The mutated site is in 3<sup>rd</sup> exon. The designed genomic DNA PCR product length was 342 bp, and it can be digested by restriction enzyme MnlI into different fragments. 4 DNA fragments (21 bp, 48 bp, 100 bp, 173 bp) were obtained in wild type (WT), 5 DNA fragments (21 bp, 48 bp, 100 bp, 173 bp, 221 bp) were obtained in *foxn1*<sup>+/−</sup>, while 3 fragments (21 bp, 100 bp, 221 bp) were obtained in *foxn1*<sup>−/−</sup>.

(B) The 2% agarose gel electrophoresis analysis of different fragments. The 21 bp and 48 bp fragments were not shown in this gel image. The WT, *foxn1*<sup>+/−</sup> and *foxn1*<sup>−/−</sup> contain 2 fragments (100 bp and 173 bp), 3 fragments (100 bp, 173 bp and 221 bp) and 2 fragments (100 bp and 221 bp), respectively.

(C) The body shape of 3-month-old *Casper*, *foxn1*<sup>+/−</sup>/*Casper* and *foxn1*/*Casper* mutant. The size of male mutant is smaller than *Casper* or *foxn1*<sup>+/−</sup>/*Casper*, while female mutant is comparable to *Casper* or *foxn1*<sup>+/−</sup>/*Casper*. Scale bar, 1 mm.

(D) The body length (centimeter, cm) of *Casper*, *foxn1*<sup>+/−</sup>/*Casper* and *foxn1*/*Casper* mutant. The body length of male *foxn1*/*Casper* mutant is significantly shorter than that of *Casper* and *foxn1*<sup>+/−</sup>/*Casper* (mean ± SD, one-way ANOVA, Tukey's; \*\**P* < 0.01, N.S.=non-significant, n=6 in each group).

(E) Survival rates of *foxn1/Casper* under non-antibiotics and antibiotics-supplemented conditions. Black short arrow denotes the genotyping of *foxn1* mutant at 70-80 dpf. Broken lines from top to bottom indicate the *Casper* under non-antibiotics condition, *foxn1/Casper* under antibiotics-supplemented condition and *foxn1/Casper* under non-antibiotics condition, respectively (one-way ANOVA, Tukey's; N.S.=non-significant, \* $P < 0.05$ , n=10).

(F) The representative confocal images of T cells in 5 dpf control and *foxn1*<sup>-/-</sup> in Tg (*rag2:dsRed*) background. The white dashed line denotes the thymus region, and the number of *rag2*<sup>+</sup> cells are decreased in *foxn1*<sup>-/-</sup>. Magnification: left panel in each group (20×), Scale bar, 50 μm; right panel in each group (20×, zoom 4×), Scale bar, 10 μm.

(G) Representative Wright-Giemsa staining pictures of different blood lineages based on Figure 11. Scale bar, 5 μm.

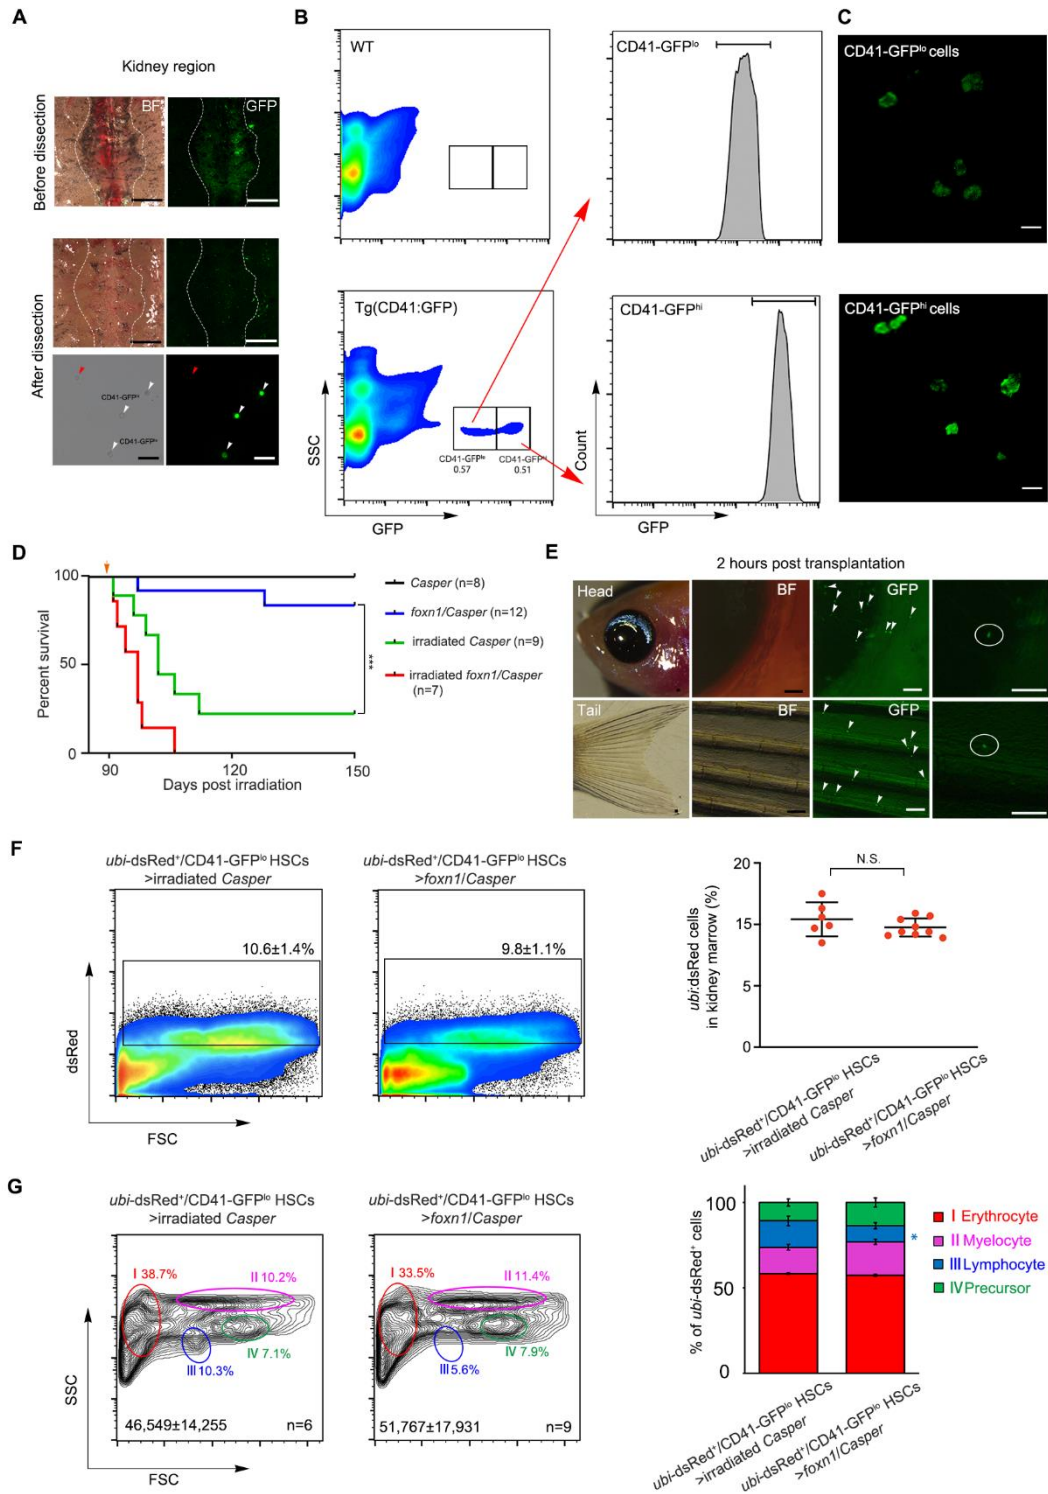

**Figure S2**

***Foxn1*/Casper Mutant Permits Nonconditioned HSCT. Related to Figure 2**

(A) The kidney marrow (KM) was obtained from Tg (CD41:GFP) adult zebrafish. The upper panels denote anatomical ventral view of KM, and middle panels indicate kidney was taken out. Scale bar, 500  $\mu$ m. The lower panels indicate dissected single cells. The white arrows denote CD41-GFP<sup>+</sup> cells



and the red arrow denotes CD41-GFP<sup>-</sup> cells. Scale bar, 50  $\mu$ m. The left row was shown in bright field (BF) and right in green fluorescent protein (GFP) field.

(B) Representative FACS images of CD41-GFP<sup>+</sup> cells. CD41-GFP<sup>+</sup> cells could be separated into GFP-low (CD41-GFP<sup>lo</sup>) and GFP-high (CD41-GFP<sup>hi</sup>) clusters, and the proportion of them in KM were 0.57% and 0.51%, respectively.

(C) Fluorescent microscopy of sorted CD41-GFP<sup>lo</sup> and CD41-GFP<sup>hi</sup> cells. Scale bar, 10  $\mu$ m.

(D) Survival rates of *Casper*, *foxn1/Casper*, irradiated *Casper* and irradiated *foxn1/Casper* under antibiotics-supplemented condition. Orange short arrow denotes the 3-month-old zebrafish irradiated at 90 dpf. Broken lines from top to bottom indicate the *Casper*, *foxn1/Casper*, 25 Gy irradiated *Casper* and 15 Gy irradiated *foxn1/Casper*, respectively (n (*Casper*)=8, n (*foxn1/Casper*)=12, n (irradiated *Casper*)=9, and n (irradiated *foxn1/Casper*)=7).

(E) Imaging of the head and tail regions of *foxn1/Casper* mutant at 2 hours post transplantation. The left panels (BF, 4 $\times$ ), middle-left (BF, 10 $\times$ ), middle-right (GFP, 10 $\times$ ), right (GFP, 20 $\times$ ) are head and tail regions, respectively. Each white arrow and circle denote one CD41-GFP<sup>lo</sup> cell. Bright field (BF), Green fluorescent protein (GFP) field. Scale bar, 100  $\mu$ m.

(F) Flow cytometric analysis of engrafted *ubi-dsRed*<sup>+</sup> cells in the recipient KM at 60 dpt (mean  $\pm$  SD, n (*ubi-dsRed*<sup>+</sup>/CD41-GFP<sup>+</sup> HSCs>irradiated *Casper*)=6, n (*ubi-dsRed*<sup>+</sup>/CD41-GFP<sup>+</sup> HSCs>*foxn1/Casper*)=9). Statistical analysis (mean  $\pm$  SD, *t* test; N.S.=non-significant)

(G) Multi-lineage differentiation potential of engrafted *ubi-dsRed*<sup>+</sup>/CD41-GFP<sup>+</sup> HSCs in recipients. Each circle represents different cell lineages (I: erythrocyte, II: myelocyte, III: lymphocyte and IV: precursor). Total cell numbers of whole KM were indicated by mean  $\pm$  SD. The statistical analysis (mean  $\pm$  SD, *t* test; \**P* <0.05, n (*ubi-dsRed*<sup>+</sup>/CD41-GFP<sup>+</sup> HSCs>irradiated *Casper*)=6, n (*ubi-dsRed*<sup>+</sup>/CD41-GFP<sup>+</sup> HSCs>*foxn1/Casper*)=9).

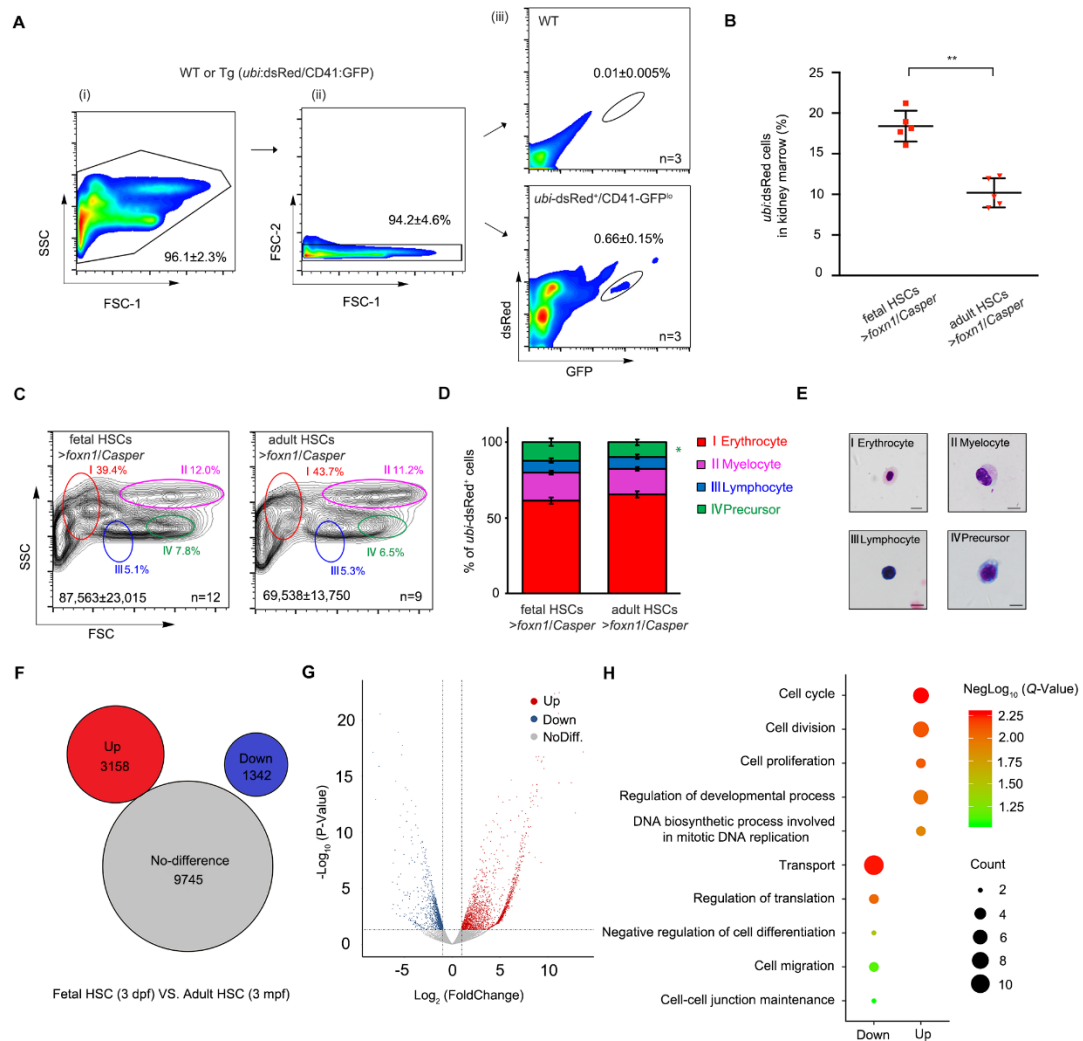

**Figure S3**

**FACS and RNA-seq Data Analysis of Zebrafish Fetal and Adult HSCs. Related to Figure 3**

(A) Representative FACS images of negative control. Live cells were gated in the first diagram, then single cells were gated to distinguish *dsRed*<sup>+</sup>/*GFP*<sup>+</sup> cells (mean ± SD, n (WT)=3, n (Tg (*ubi:dsRed/CD41-GFP*))=3).

(B) Statistical analysis of the engraftment efficiency of fetal and adult HSC at 90 dpt. (mean ± SD, *t* test; \*\**P* < 0.01, n (fetal HSCs >*foxn1/Casper*)=5, n (adult HSCs >*foxn1/Casper*)=5).

(C) Multi-lineage differentiation potential of engrafted fetal and adult HSCs in *foxn1/Casper* recipients. Each circle represents different cell lineages (I: erythrocyte, II: myelocyte, III: lymphocyte and IV: precursor). Total cell numbers of whole KM were indicated by mean ± SD.

(D) The statistical analysis of (B) (mean ± SD, *t* test; \**P* < 0.05, n (fetal HSCs >*foxn1/Casper*)=12, n (adult HSCs >*foxn1/Casper*)=9).

(E) Representative Wright-Giemsa staining pictures of different blood lineages based on (C). Scale

bar, 5  $\mu\text{m}$ .

(F) The bulk RNA-seq data of fetal HSCs and adult HSCs show that 3,158 and 1,342 genes were upregulated and downregulated, respectively. HSCs were sorted from Tg (CD41:GFP) zebrafish line and 2 replicates were performed in each group.

(G) Volcano analysis of gene expression level. Red, green and grey dots denote the upregulated, downregulated and no differential expressed transcripts, respectively.

(H) Gene ontology analysis of differentially expressed genes. Most of the upregulated genes were enriched in "cell cycle" and "cell division" terms. The heat bar denotes the significant difference and the size of circle denotes the number of differential genes in each term.

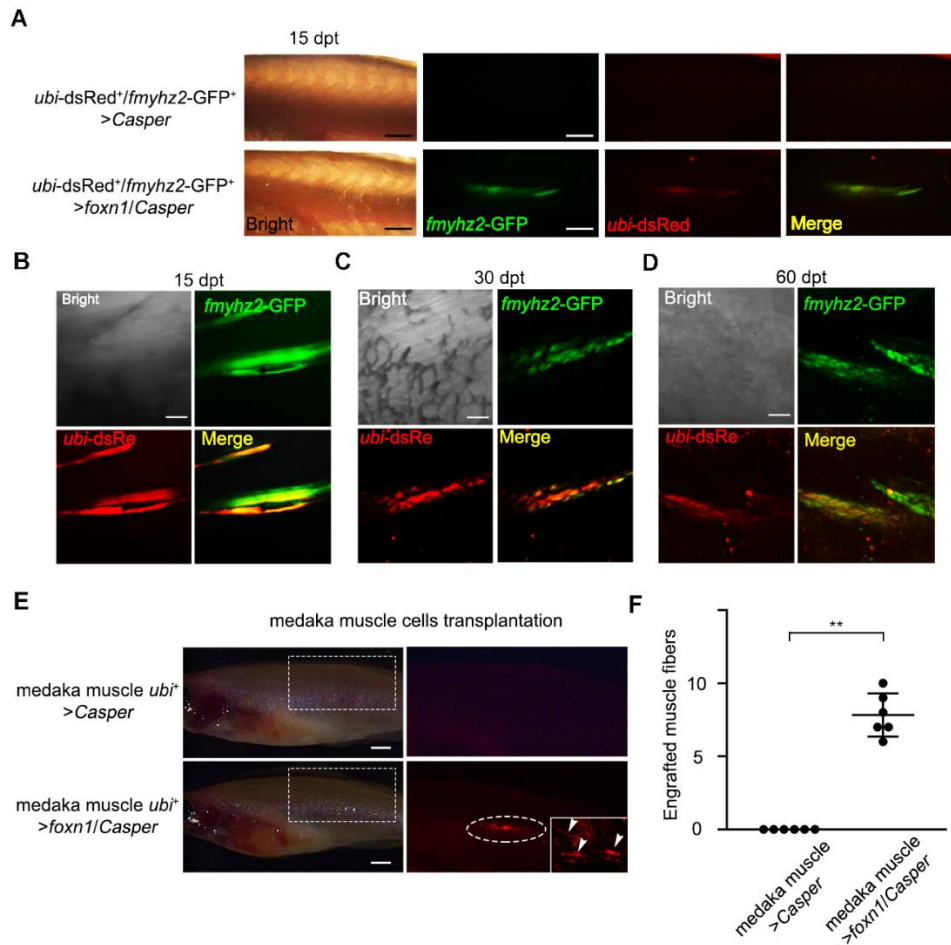

**Figure S4**

**Allogeneic and Xenogeneic Muscle Cell Transplantation with Zebrafish Tg (*ubi:dsRed/fmyh2:GFP*) and Medaka Tg (*ubi:mCherry*)**

(A) The observation of engrafted muscle cells at 15 dpt. The upper panels denote *Casper* recipient, the lower panels denote *foxn1/Casper* recipient. n (*Casper*)=0/10, n (*foxn1/Casper*)=12/16. Scale bar, 1 mm.

(B and C) Confocal imaging of muscle cells at 15 and 30 dpt. Magnification: 20 $\times$ . Scale bar, 100  $\mu$ m.

(D) Confocal imaging of muscle cells at 60 dpt. Magnification: 20 $\times$ . Scale bar, 100  $\mu$ m.

(E) Confocal imaging of engrafted medaka muscle cells at 30 dpt. The *ubi-mCherry<sup>+</sup>* cells could be visualized in *foxn1/Casper* recipients, not in the *Casper* recipients. n (*Casper*)=0/5, n (*foxn1/Casper*)=6/12. Scale bar, 1 mm.

(F) The statistical analysis of muscle fibers in each engrafted recipient (mean  $\pm$  SD, *t* test; \*\**P*<0.01, n (medaka muscle *ubi<sup>+</sup>>Casper*)=6, n (medaka muscle *ubi<sup>+</sup>>foxn1/Casper*)=6).

**Table S1. The Statistical Analysis of Adult Kidney Marrow in WT, *foxn1*<sup>+/-</sup> and *foxn1*<sup>-/-</sup>.**

**Related to Figure 1**

|                 | Wild type sibling (n=4) | <i>foxn1</i> heterozygous sibling (n=5) | <i>foxn1</i> mutant (n=3) |
|-----------------|-------------------------|-----------------------------------------|---------------------------|
| I Erythrocytes  | 42.4±8.6%               | 53.6±7.2                                | 58.8±6.3%                 |
| II Myelocytes   | 15.4±3.5%               | 16.1±4.1                                | 12.4±5.2%                 |
| III Lymphocytes | 13.8±2.8%               | 11.5±3.2                                | 5.3±1.6% **               |
| IV Precursors   | 6.4±2.3%                | 7.2±2.5                                 | 4.8±2.1% *                |

Note: data represented as mean ± SD (%) of each blood lineage in kidney marrows, *t* test (wild-type vs. mutant); \**P* < 0.05, \*\**P* < 0.01.

**Table S2. Transplantation with flow cytometry sorted CD41-GFP<sup>lo</sup> cells from Tg (CD41:GFP).**

**Related to Figure 2**

| 10,000 CD41-GFP <sup>lo</sup> cells/recipients | Survival (%) | Engrafted (%) |
|------------------------------------------------|--------------|---------------|
| <i>Casper</i>                                  | 10/10 (100)  | 0/10 (0)      |
| <i>foxn1/Casper</i>                            | 15/19 (79)   | 8/15 (53)     |
| Irradiated <i>Casper</i> (25 Gy)               | 13/23 (56)   | 8/13 (62)     |
| Irradiated <i>foxn1/Casper</i> (15 Gy)         | 4/21 (19)    | 4/4 (100)     |

Note: The proportion of CD41-GFP<sup>+</sup> > 0.1% in recipient KM was set as the cut off for positive engraftment.

**Table S3. Transplantation with flow cytometry sorted fetal and adult HSCs from Tg (*ubi:dsRed/CD41:GFP*) . Related to Figure 3**

| 10,000 <i>ubi</i> -dsRed <sup>+</sup> /CD41-GFP <sup>lo</sup> cells/recipient |                     | Survival (%) | Engrafted (%) |
|-------------------------------------------------------------------------------|---------------------|--------------|---------------|
| Fetal (3 dpf) derived HSCs                                                    | <i>Casper</i>       | 6/6 (100)    | 0/6 (0)       |
|                                                                               | <i>foxn1/Casper</i> | 20/24 (83)   | 12/20 (60)    |
| Adult (3 mpf) derived HSCs                                                    | <i>Casper</i>       | 7/8 (88)     | 0/7 (0)       |
|                                                                               | <i>foxn1/Casper</i> | 15/20 (75)   | 9/15 (60)     |

Note: The proportion of *ubi*-dsRed<sup>+</sup> > 1% of recipient KM was set as the cut off for positive engraftment.

**Table S4. Quantitative PCR Primer Pairs**

| <b>Gene</b>   | <b>Forward Primer (5'-3')</b> | <b>Reverse Primer (5'-3')</b> |
|---------------|-------------------------------|-------------------------------|
| <i>foxn1</i>  | CATTAGGCACTGATGTGGAGAC        | ACTGGTGTTGTAGAGGACTG          |
| <i>rag1</i>   | AGAGGACAGTGGGTAAAGA           | ATGGGTTTCAGGTGTTGGTT          |
| <i>rag2</i>   | TGAGACTCAGAAGCGCATGG          | ACCAAGTACGACTGTGGCTG          |
| <i>lck</i>    | GCCTCCAGTCAGTCAGAATTT         | TTGTATATGGCCACCACCAG          |
| <i>tcra</i>   | ACCAAGTGGGAAACTCATGC          | TGCCCAGTGACAAGAAGTTG          |
| <i>tcrb</i>   | CCGAAGGGATTGAAGCTGGT          | ACCAGTGCATACAGGAAGCTC         |
| <i>igm</i>    | GTTTCCTCAGCTCAACCA            | AGTATAATCTCCTTCCTTCCC         |
| <i>igz</i>    | AAAGCAACGATACCAAAGTG          | AACAGCTTGCAAGACAATTC          |
| <i>pax5</i>   | TCTGGCTGGCGGATTG              | TGTGGAGTAACTGCCTTGTC          |
| <i>cd37</i>   | TGTTGACGGTTCTGCTC             | TTCCTGCCTCTGAATGTA            |
| <i>il2rb</i>  | GAAGCCAGTTGAGCCG              | TTTGGGTGAATCCTCTTTT           |
| <i>lyz</i>    | GTGAAAATGGACGGGCTGAA          | CTTTGTTGCGCTGCTCACA           |
| <i>mpo</i>    | CCGTGGATTGATTGGTCGTC          | CACCACAGCCAATTCTTGCT          |
| <i>ccna1</i>  | TGGCTCAGGGTCATTTATGGA         | ATTCTTCGCCAACTTCCACC          |
| <i>ccnb1</i>  | GGCGTTAAGGTTGTGTCTGAG         | TTCACTGCAAAGCATGGGA           |
| <i>ccne</i>   | CTGGCTAATGGAGGTTTGTGAG        | GGCAGCTATAAAGAGACAGGAG        |
| <i>ccnd1</i>  | CGGCGAATTATTGCAAATGGA         | AGAGGGCCACAAAGGTCTG           |
| <i>ccnh</i>   | TTGATCTGAAGACCAGGTACCC        | ATCCATCTTGAGGCCAGCAC          |
| <i>cdk1</i>   | GTTGTACGCCTGCTAGATGTG         | CCCTCCAGGATCTGATAAAGGT        |
| <i>cdk2</i>   | GAATCTCCTCATCAACGCTCAG        | GCCCTCCGAGTAATCATTTCAG        |
| <i>cdk7</i>   | AGTTGTCACAAGATGGTATCGG        | GATCTCATCTGTTGGTGTTC          |
| <i>cdc20</i>  | TACGCACCAGAGGGTTATCAG         | TGTCTCCTTACCAGCATCC           |
| <i>pcna</i>   | GCATTCCAGAGCAGGAATACAG        | TGATGTTGCCTGTGCCCA            |
| <i>cdkn1a</i> | TGCAGAAGCTCAAAACATATTGTC      | ACGCAAAGTCGAAGCTCCAG          |
| <i>cdkn1b</i> | GTCTCGCTCATCGTGTCAAA          | TATGTGGGTGTCCGACTCAA          |
| <i>foxn1</i>  | CATTAGGCACTGATGTGGAGAC        | ACTGGTGTTGTAGAGGACTG          |
